# Supplementary material for: Adipic acid formation from cyclohexanediol using platinum and vanadium catalysts: elucidating the role of homogeneous vanadium species
Source: Royal Society of Chemistry journal article supplement (doi:10.1039/d0cy00914h), 2020-01-01
Supplement: d0cy00914h1.pdf [file d0cy00914h1.pdf]

## Supplementary Information

### Adipic acid formation from cyclohexanediol using platinum and vanadium catalysts: Elucidating the role of homogeneous vanadium species

Owen Rogers<sup>1</sup>, Samuel Pattisson<sup>1</sup>, Rebecca V. Engel<sup>1</sup>, Robert L. Jenkins<sup>1</sup>, Keith Whiston<sup>2</sup>, Stuart H. Taylor<sup>1</sup>, Graham J. Hutchings<sup>1,\*</sup>

1. Cardiff Catalysis Institute, School of Chemistry, Cardiff University, Main Building, Park Place, Cardiff, CF10 3AT.
2. INVISTA Performance Technologies, The Wilton Centre, Wilton, Redcar, TS10 4RF, United Kingdom.

\* Correspondence: [hutch@cf.ac.uk](mailto:hutch@cf.ac.uk) Tel.: +44 2920 874059

Table S1 Spreadsheet to show the vanadium stoichiometry ratio for the oxidation of 2-hydroxycyclohexanone to adipic acid **Reaction conditions:** 80 °C, 3 bar O<sub>2</sub>, 4 h, 4000 ppm 2-hydroxycyclohexanone in water (5 ml), vanadium added as a stock solution of 200 ppm V<sub>2</sub>O<sub>5</sub> in water.

| Vanadium concentration / ppm | Moles of vanadium / mmol L <sup>-1</sup> | Concentration of product (adipic acid) / ppm | Moles of Product (adipic acid) / mmol L <sup>-1</sup> | Stoichiometry ratio (vanadium:AA) |
|------------------------------|------------------------------------------|----------------------------------------------|-------------------------------------------------------|-----------------------------------|
| 3.25                         | 0.064                                    | 5.39                                         | 0.037                                                 | 1.731                             |
| 7.56                         | 0.148                                    | 68.32                                        | 0.468                                                 | 0.317                             |
| 9.62                         | 0.189                                    | 177.53                                       | 1.215                                                 | 0.155                             |
| 11.76                        | 0.231                                    | 242.41                                       | 1.659                                                 | 0.139                             |
| 13.42                        | 0.263                                    | 271.67                                       | 1.859                                                 | 0.142                             |
| 18.62                        | 0.366                                    | 431.03                                       | 2.949                                                 | 0.124                             |
| 22.11                        | 0.434                                    | 546.47                                       | 3.739                                                 | 0.116                             |
| 28.62                        | 0.562                                    | 592.19                                       | 4.052                                                 | 0.139                             |
| 27.70                        | 0.544                                    | 710.77                                       | 4.864                                                 | 0.112                             |
| 31.30                        | 0.614                                    | 822.81                                       | 5.630                                                 | 0.109                             |
| 32.30                        | 0.634                                    | 937.75                                       | 6.417                                                 | 0.099                             |
| 39.40                        | 0.773                                    | 778.54                                       | 5.327                                                 | 0.145                             |
| 42.30                        | 0.830                                    | 880.35                                       | 6.024                                                 | 0.138                             |
| 43.80                        | 0.860                                    | 1081.39                                      | 7.400                                                 | 0.116                             |
